# Supplementary material
Source: Elsevier journal article supplement (https://eprints.lib.hokudai.ac.jp/dspace/bitstream/2115/57666/4/mmc3.xlsx)
Supplement: mmc3 [file mmc3.xlsx]

## Sheet: Sheet1
General taxonomy			Sramenopiles	Sramenopiles	Sramenopiles	Sramenopiles	Plant	Plant	Plant	Plant	Plant	Plant	Rhizaria	Hacrobia	Alveolata	Excavata	Opisthokonta	Opisthokonta	Opisthokonta	Opisthokonta
			Pelagophyte	Centric diatom	Pennate diatom	Oomycete	Red algae	Red algae	Green algae	Green algae	Green algae	Land plant	Cercozoa (chlorarachniophyte)	Cryptophyta	Ciliophora	Euglenozoa	Fungi (Ascomycota)	Fungi (Chytridiomycota)	Metazoa	Metazoa
Organisms			Aureococcus anophagefferens	Thalassiosira pseudonana	Phaeodactylum tricornutum	Phytophthora infestans	Chondrus crispus	Cyanidioschyzon merolae	Chlamydomonas reinhardtii	Micromonas pusilla	Ostreococcus tauri	Arabidopsis thaliana	Bigelowiella natans	Guillardia theta	Tetrahymena thermophila	Trypanosoma brucei	Schizosaccharomyces pombe	Batrachochytrium dendrobatidis	Strongylocentrotus purpuratus	Homo sapiens
Flagellated stage in lifecycle			Unknown	9+0	None	9+2	None	None	9+2	9+2	None	None	9+2	9+2	9+2	9+2	None	9+2	9+2	9+2
Accession number of brown algae flagelar proteins	Description	GO annotation	Definition of different colors: A yellow color indicates the presence of an orthologous proteins in the genome, and the accession number of the orthologous protein is shown; A red color indicates the flagellar protein passed e value (1e-10) test when it was analyzed in the first round BLAST (CbFP against genome database) yet failed in the reciprocal BLAST (genome database against CbFP); A blue co…
CBJ26064.1	beta tubulin	beta-tubulin
CBJ26065.1	beta tubulin	beta-tubulin			XP_002185730.1	XP_002908783.1			XP_001693997.1			AAF26774.2|AC007396_23		EKX38351.1		AAA30261.1		EGF78946.1	XP_001192875.1	CAA26203.1
CBJ30701.1	beta tubulin	beta-tubulin	EGB09376.1	XP_002292479.1			CDF34543.1			XP_003056479.1	XP_003074279.1		50422|estExt_Genewise1.C_780048
CBN79445.1	beta tubulin	beta-tubulin
CBJ28184.1	alpha tubulin	alpha tubulin 1				XP_002904195.1
CBN77378.1	alpha tubulin	alpha tubulin 1	EGB07780.1	XP_002292237.1	XP_002180656.1		CDF36897.1	BAC67665.1	AAN87017.1	XP_003058621.1	XP_003080933.1	AAK95316.1|AF410330_1	48500|estExt_Genewise1.C_280038	EKX52746.1	EAS02179.1	AAA30262.1	NP_595106.1	EGF82948.1	XP_795276.3	A23035
CBJ30475.1	dynein heavy chain	dynein heavy chain	EGB06078.1	XP_002288087.1		XP_002998160.1			AAA50455.1	XP_003059926.1			50235|estExt_Genewise1.C_710023	EKX42347.1	EAR82190.1	AAX69891.1	EGF79933.1	EGF79933.1	XP_003725056.1	AAK92217.1
CBJ26575.1	dynein heavy chain	dynein heavy chain	EGB10925.1	XP_002289473.1		XP_002900449.1			XP_001695126.1	XP_003062890.1			92928|estExt_fgenesh1_pm.C_1000004	EKX39387.1				EGF77334.1	XP_786200.3	NP_775899.3
CBJ30911.1	Dynein heavy chain family dynein heavy chain	dynein heavy chain	EGB11298.1	XP_002295976.1		XP_002906492.1			XP_001695733.1	XP_003057702.1				EKX47840.1
CBJ26132.1	PAS/PAC sensor hybrid histidine kinase putative blue light receptor	pas pac sensor protein
CBN74482.1	conserved unknown protein	creatine kinase s- mitochondrial precursor		XP_002293099.1		XP_002899758.1								EKX47441.1	EAS01429.1	CBH14255.1			XP_794336.1	2GL6B
CBJ27642.1	Putative	sperm associated antigen 6	EGB03432.1			XP_002907894.1			XP_001694680.1	XP_003061330.1			92383|estExt_fgenesh1_pm.C_190011	EKX46796.1		CBH08982.1		EGF77308.1	XP_794211.1	BAF82592.1
CBJ25902.1	Dynein-1-alpha heavy chain	dynein heavy chain	EGB03490.1			XP_002908337.1			XP_001703170.1	XP_003061928.1	XP_003080093.1		49976|estExt_Genewise1.C_620014	EKX40412.1	EAS06707.1	AAX80961.1		EGF80533.1		EAW98437.1
CBJ48797.1	conserved unknown protein	guanine nucleotide-binding protein subunit beta	EGB03726.1	XP_002293634.1	XP_002182135.1	AAL11438.1						CAA18825.1	79237|fgenesh1_pg.60_#_108		EAR87263.1		NP_595613.1	EGF76839.1	XP_001176793.1	CAA28207.1
CBJ30119.1	14-3-3-like protein	14-3-3-like protein	EGB07462.1	XP_002288685.1	XP_002182626.1	AAN31465.1	CDF33426.1	BAM81856.1	CAA55964.1	XP_003064340.1	CAY32859.1	CAB78024.1	92828|estExt_fgenesh1_pm.C_780004	EKX50117.1	EAR89562.2	BAD38893.1	NP_594167.1	EGF79131.1	XP_780278.2	CAE11697.1
CBJ30601.1	actin	actin	EGB05933.1	XP_002294917.1	XP_002183295.1	XP_002898284.1	AAA97521.1	BAC67664.1	BAA09450.1	XP_003061104.1	XP_003083487.1		87880|estExt_fgenesh1_pg.C_250108	EKX33055.1	EAR96427.1	CBH14414.1	NP_595618.1	EGF82393.1	1101351C	3BYHA
CBN79844.1	dynein heavy chain	dynein heavy chain	EGB05302.1			XP_002909609.1			XP_001694660.1	XP_003061397.1			46472|estExt_Genewise1.C_40322	EKX49966.1	EAR83316.1	CBH15567.1		EGF80885.1		BAA92648.3
CBJ29295.1	Molecular chaperones HSP70/HSC70, HSP70 superfamily	heat shock protein 70		XP_002291508.1			CDF32645.1
CBJ48496.1	flagellar associated protein putative: flagellar associated protein	flagellar associated protein	EGB11266.1			XP_002909353.1			XP_001690930.1	XP_003057834.1	XP_003080326.1		88461|estExt_fgenesh1_pg.C_320076	EKX37892.1	EAR90675.1	CBH17757.1	EGF78625.1	EGF78625.1	XP_787783.1	EAW90026.1
CBN74276.1	putative, Dynein intermediate chain	dynein-like protein	EGB02757.1	XP_002290008.1		XP_002996932.1			XP_001691005.1	XP_003060449.1			126858|aug1.3_g1566	EKX55066.1	EAR95519.1	CBH18482.1		EGF84346.1	XP_796667.1	CAC17464.1
CBJ27915.1	Flagellar Associated Protein	transcription factor iib	EGB07409.1	XP_002286290.1		XP_002902732.1			XP_001692489.1	XP_003056110.1		AAL09761.1	47809|estExt_Genewise1.C_190017	EKX55078.1	EAR87068.2	XP_822473.1		EGF82905.1	XP_797150.1	AAD40382.1
CBJ27165.1	dynein heavy chain	dynein heavy chain axonemal	EGB11896.1			XP_002901017.1			XP_001700741.1	XP_003057104.1			35897|e_gw1.11.91.1	EKX45970.1	EAS00969.1			EGF82752.1	XP_003724506.1	BAA76788.2
CBJ30272.1	GPA1, alpha subunit of a heterotrimeric G protein	g-protein alpha subunit 1	EGB10363.1	XP_002292485.1	XP_002185658.1	AAL11436.1						AAC14520.1	52805|estExt_Genewise1Plus.C_120022				EGF78517.1	EGF78517.1	XP_780339.1	CAA79310.1
CBJ32625.1	putative, Dynein intermediate chain	dynein intermediate chain 2	EGB05742.1	XP_002291652.1		XP_002906917.1			XP_001692878.1	XP_003055663.1			87970|estExt_fgenesh1_pg.C_260131	EKX42942.1	EAR85264.1	CBH17446.1		EGF81513.1	XP_789673.2	CAI13155.1
CBJ25862.1	conserved unknown protein	sodium potassium-transporting atpase subunit	EGB06875.1			XP_002897836.1	CDF38427.1	BAM80984.1	XP_001696293.1	XP_003062064.1	XP_003074149.1			EKX34242.1			NP_595098.1	EGF82503.1	NP_001116982.1	BAG52393.1
CBN75228.1	Serine/threonine protein kinase, possibly NIMA-like	protein kinase domain containing protein				XP_002896013.1			XP_001700340.1				52279|estExt_Genewise1Plus.C_70002		EAR99166.1		NP_593305.1	EGF82862.1	XP_782796.3	AAH15147.1
CBJ32211.1	axonemal 1-beta dynein heavy chain dynein heavy chain	heavy chain 2	EGB03737.1			XP_002906266.1				XP_003063693.1	XP_003082801.1		57028|fgenesh1_pm.1_#_53	EKX36467.1	EAR99953.1	CBH13352.1		EGF78014.1		BAA96027.2
CBJ33732.1	hypothetical protein Esi_0577_0005	hypothetical protein Esi_0577_0005
CBJ28078.1	S-Adenosyl homocysteine hydrolase	s-adenosyl homocysteine hydrolase	EGB12037.1	XP_002291342.1	XP_002177758.1	XP_002902721.1	CDF37163.1	BAM78951.1	XP_001693339.1	XP_003057172.1	XP_003081254.1	AAP92453.1	47828|estExt_Genewise1.C_190037	EKX43896.1	EAS02842.1	CBH17958.1	NP_595580.1	EGF82553.1	XP_780172.1	BAF83111.1
CBJ30984.1	putative: flagellar radial spoke protein 4	radial spoke head protein 4 homolog a	EGB03666.1			XP_002998387.1			XP_001700728.1	XP_003061185.1			85932|estExt_fgenesh1_pg.C_70048	EKX54588.1	EAS03035.1			EGF78108.1	AAC38955.1	BAD97067.1
CBN76011.1	ARL3, ARF-like Ras superfamily GTPase	adp-ribosylation factor-like protein 3-like	EGB05938.1	XP_002286376.1	XP_002179263.1	XP_002902933.1	CDF33531.1		XP_001692252.1	XP_003057823.1	XP_003079185.1	AAD15498.1	56626|estExt_Genewise1Plus.C_1090017	EKX50006.1	EAR82037.1	AAX69671.1	NP_593036.1	EGF79960.1	XP_787365.2	BAG35424.1
CBJ26725.1	n/a	echinoderm microtubule-associated 6	EGB06694.1
CBJ27929.1	conserved unknown protein	function unknown protein				XP_002998904.1				XP_003061926.1
CBJ25983.1	putative: flagellar/basal body protein, PACRG (parkin co-regulated gene)-like protein	parkin coregulated gene	EGB08314.1	XP_002289489.1		XP_002900440.1			BAG12189.1	XP_003059791.1			92226|estExt_fgenesh1_pm.C_80012	EKX49826.1	EAS03147.1	AAX80688.1		EGF76711.1	XP_791188.1	DAA02134.1
CBN79468.1	Calcium-dependent protein kinase, isoform 2 (CDPK 2) Protein kinase domain containing protein	calcium-dependent protein	EGB08444.1	XP_002294378.1	XP_002176976.1	XP_002896574.1	CDF38320.1	BAM79433.1	XP_001693482.1	XP_003055256.1	XP_003078254.1	BAF00959.1	89637|estExt_fgenesh1_pg.C_530006	EKX35163.1	EAR82389.1		NP_593464.1		XP_797065.2	2JC6A
CBJ28741.1	conserved unknown protein	protein phosphatase 2c containing protein	EGB08926.1	XP_002293411.1	XP_002182053.1					XP_003064153.1
CBJ49241.1	Dynein heavy chain	dynein heavy chain axonemal
CBJ28846.1	conserved unknown protein	camp-dependent protein kinase catalytic	EGB05735.1	XP_002286155.1	XP_002176837.1	XP_002907356.1	CDF34151.1	BAM82434.1		XP_003061072.1	XP_003075179.1		57190|fgenesh1_pm.5_#_27	EKX35637.1	EAR91124.2	CBH14583.1	NP_595159.1	EGF84056.1	XP_794667.2	CAA59733.1
CBN78680.1	dynein heavy chain	dynein heavy chain
CBJ34040.1	conserved unknown protein	camp-dependent protein kinase regulatory subunit	EGB03732.1	XP_002288932.1	XP_002176836.1	XP_002907577.1				XP_003062135.1				EKX36561.1	EAS03641.2	AAG49384.1|AF326975_2	NP_594274.1	EGF83549.1	XP_793333.2	CAA01027.1
CBJ31978.1	putative: flagellar outer dynein arm light chain 6	dynein light chain cytoplasmic	EGB03276.1	XP_002292046.1	XP_002184123.1	XP_002999301.1	CDF36735.1	BAM83309.1	XP_001702907.1	XP_003056096.1	XP_003074116.1	AAO44051.1	56409|estExt_Genewise1Plus.C_980032	EKX34442.1	EAS05859.1	CBH16955.1	NP_594368.1	EGF79949.1	XP_795719.1	CAJ42804.1
CBJ48386.1	calcium-binding protein	calcium-binding protein	EGB09682.1															EGF77217.1
CBJ31339.1	similar to spermatogenesis associated factor SPAF	spermatogenesis-associated protein 5-like				XP_002909597.1											NP_596710.1	EGF84468.1	XP_790164.2	EAX05214.1
CBJ30951.1	conserved unknown protein	function unknown protein
CBN79251.1	conserved unknown protein	ubiquitin c							XP_001701379.1					EKX44830.1
CBJ28331.1	Tubular mastigoneme-related protein	tubular mastigoneme-related protein		XP_002286233.1		XP_002901736.1
CBJ33055.1	conserved unknown protein	nucleoporin 155
CBJ30656.1	conserved unknown protein	rab6 gtpase activating gapcena (rabgap1 protein)										AAF32453.1
CBJ29082.1	conserved unknown protein	ptype atpase		XP_002288680.1		XP_002898617.1			XP_001701792.1						EAR82386.2
CBJ25570.1	dynein heavy chain	dynein heavy chain													EAR85209.1
CBJ28571.1	conserved unknown protein	multidrug resistance protein 1
CBJ28568.1	ATP-binding cassette, sub-family B (MDR/TAP), member 1A	multidrug resistance protein 1	EGB12229.1	XP_002293142.1		XP_002898134.1	CDF37870.1		XP_001697151.1	XP_003060340.1	XP_003074516.1			EKX53577.1	EAR82417.1		NP_588265.1	EGF83631.1	XP_787761.3	CAD28599.1
CBJ31790.1	Protofilament ribbon protein of flagellar microtubules	protofilament ribbon protein of flagellar microtubules	EGB04535.1	XP_002286640.1		XP_002904100.1			DAA00063.1	XP_003058450.1			92390|estExt_fgenesh1_pm.C_190024	EKX31875.1	EAR84928.1	CBH17036.1		EGF80275.1	XP_791515.2	CAE89309.1
CBJ31039.1	conserved unknown protein	ef hand family protein
CBJ31041.1	dynein heavy chain	sporangia induced dynein heavy chain
CBN75620.1	ef-hand domain (C-terminal) containing protein	ef-hand domain (c-terminal) containing protein
CBJ48862.1	n/a	14-3-3-like protein
CBJ29733.1	dynein heavy chain	dynein heavy chain	EGB11557.1
CBN75029.1	conserved unknown protein	calcyphosin-like protein				XP_002908043.1				XP_003059384.1										3E3RB
CBN78578.1	UDP-glucose 4-epimerase	udp-glucose 4-epimerase
CBJ25762.1	n/a	radial spoke protein 7								XP_003060345.1
CBN79758.1	peptidyl-prolyl cis-trans isomerase, cyclophilin-type	cyclophilin-like protein	EGB10133.1	XP_002294514.1	XP_002178047.1	AAN31483.1	CDF40125.1	BAM81631.1	XP_001700372.1	XP_003062207.1	XP_003081129.1	CAW66828.1	54729|estExt_Genewise1Plus.C_420003	EKX42351.1	EAR90523.2	AAX79541.1	NP_595664.1	EGF79988.1	XP_790143.2	2Z6WA
CBN75242.1	flagellar radial spoke protein 16	dnaj heat shock protein	EGB13004.1	XP_002289962.1		XP_002907064.1	CDF36470.1	BAM81477.1	XP_001702613.1	XP_003060690.1	XP_003082195.1	ACI31315.1	33240|e_gw1.1.137.1	EKX31379.1	EAR85350.2	AAC32771.1	NP_588477.1	EGF83658.1	XP_798465.1	CAG38724.1
CBN75908.1	Pheophorbide a oxygenase, putative chloroplast precursor	pheophorbide a chloroplast precursor							XP_001697234.1	XP_003058352.1	XP_003083174.1	AAL07017.1		EKX38158.1
CBN80194.1	Tubular mastigoneme-related gene	sig2-like protein	EGB08487.1	XP_002296259.1		XP_002903590.1														CAA39628.1
CBJ48460.1	Molecular chaperones GRP78/BiP/KAR2, HSP70 superfamily	heat shock protein chaperone		XP_002288567.1	XP_002178567.1	XP_002909118.1	CDF38594.1	BAM83489.1	XP_001701685.1	XP_003055985.1	XP_003074861.1	CAW63988.1	88281|estExt_fgenesh1_pg.C_300053	EKX42534.1	EAR88498.1	CBH17750.1		EGF83011.1	XP_003728714.1	AAI12964.1
CBJ31040.1	dynein heavy chain	dynein heavy chain axonemal
CBJ30163.1	similar to titin isoform N2-B	function unknown protein
CBJ48641.1	conserved unknown protein	nucleoside diphosphate	EGB10638.1	XP_002295246.1	XP_002181437.1	XP_002903220.1	CDF36693.1	BAM80721.1	XP_001698246.1	XP_003061305.1	XP_003083157.1	CAA49170.1	49587|estExt_Genewise1.C_520030	EKX34775.1	EAR98243.1	CBH18689.1	NP_592857.1	EGF82870.1	XP_799145.2	1NUEB
CBJ49240.1	dynein heavy chain	dynein heavy chain axonemal-like
CBN80239.1	p28, 28 kDa light chain of axonemal inner dynein arms	axonemal dynein light chain p33	EGB09524.1			XP_002908170.1							52295|estExt_Genewise1Plus.C_70025		EAR92655.1
CBJ29923.1	conserved unknown protein	kinesin-like calmodulin-binding protein homolog	EGB10839.1			XP_002903616.1	CDF35474.1	BAM83113.1	XP_001698101.1	XP_003061362.1	XP_003081842.1	NP_001190628.1	44121|e_gw1.89.18.1	EKX35813.1	EAR88126.1		NP_593458.1		AAF04841.1|AF191095_1	AAH41132.1
CBN74485.1	dynein heavy chain	dynein heavy chain	EGB11250.1			XP_002907998.1			XP_001692695.1	XP_003059075.1			37448|e_gw1.20.139.1	EKX47616.1	EAR90163.1	XP_829187.1		EGF78087.1	XP_786228.3	NP_001361.1
CBJ32589.1	pyruvate kinase	pyruvate kinase	EGB09412.1	XP_002289867.1	XP_002183637.1	XP_002903652.1	CDF38208.1	BAM81868.1	XP_001693008.1	XP_003056336.1	XP_003083494.1	BAF01483.1	43086|e_gw1.72.54.1	EKX52520.1	EAR90515.2	CBH16549.1	NP_594346.1	EGF84121.1	XP_003730987.1	3BJFA
CBJ28528.1	expressed unknown protein	expressed unknown protein
CBJ27187.1	conserved unknown protein	calcium calmodulin-dependent 3 -cyclic nucleotide phosphodiesterase 1a	EGB12333.1	XP_002295832.1		XP_002902978.1			XP_001700481.1	XP_003055467.1	XP_003078373.1		43849|e_gw1.85.22.1	EKX46145.1				EGF82460.1	ABJ51878.1	BAH12143.1
CBN76243.1	dynein heavy chain dynein heavy chain	low quality protein: cytoplasmic dynein 2 heavy chain 1-like	EGB03148.1			XP_002899626.1			XP_001696428.1	XP_003057265.1			68554|fgenesh1_pg.6_#_222	EKX39469.1	EAS02149.1	XP_844206.1		EGF76431.1	XP_003725144.1
CBN75582.1	conserved unknown protein	rib43a-like with coiled-coils protein 2-like
CBN76893.1	conserved unknown protein	kinesin family member 17	EGB09336.1		XP_002178669.1	XP_002903806.1		BAM79079.1				AEC09215.1	87357|estExt_fgenesh1_pg.C_190148
CBJ28516.1	Ankyrin	ankyrin repeat transient receptor potential channel
CBN73796.1	conserved unknown protein (Partial)	abc transporter b family protein
CBJ30094.1	dynein heavy chain	dynein heavy chain axonemal				XP_002903693.1							92662|estExt_fgenesh1_pm.C_490007	EKX36692.1	EAR91160.1
CBN76841.1	conserved unknown protein	mitotic spindle assembly checkpoint protein mad1 put			XP_002181608.1	XP_002999102.1
CBJ28164.1	conserved unknown protein	wd repeat-containing protein 96
CBJ33758.1	hypothetical protein Esi_0592_0002	dynein light chain cytoplasmic	EGB13057.1
CBN75122.1	ubiquitin	ubiquitin extension protein				XP_002902716.1		BAM81237.1	XP_001696195.1	XP_003062279.1		AAC34235.1						EGF84094.1	XP_784247.1	CAC36459.1
CBN75339.1	hypothetical protein Esi_0078_0082	hypothetical protein Esi_0078_0082
CBJ48836.1	eIF-2alpha kinase GCN2 similar to Eukaryotic translation initiation factor 2-alpha kinase 4 (GCN2-li	eukaryotic translation initiation factor 2 alpha kinase 4				XP_002998608.1
CBJ29363.1	flagellar associated protein	flagellar associated protein				XP_002999136.1			XP_001693839.1	XP_003057198.1	XP_003081048.1				EAR92616.2	CBH18102.1			XP_797536.3	CAI12110.1
CBN77300.1	conserved unknown protein	tetratricopeptide repeat protein 18
CBN73983.1	putative initiation factor eIF3 g subunit	eukaryotic translation initiation factor 3 p42	EGB07983.1			XP_002907862.1						BAD94565.1		EKX35018.1					XP_791582.2
CBJ27258.1	conserved unknown protein	tpr-like protein
CBN73927.1	GPA5, alpha subunit of a heterotrimeric G protein	g-protein subunit alpha 8
CBJ27535.1	possible vacuolar protein	possible vacuolar protein	EGB10239.1
CBJ30288.1	conserved unknown protein	spermatogenesis associated 4
CBJ48309.1	Dynein light chain flagellar outer dynein arm light chain LC1	dynein light chain axonemal-like	EGB11004.1	XP_002291936.1		XP_002998326.1			1M9LA	XP_003056229.1		BAB02715.1	52413|estExt_Genewise1Plus.C_80015	EKX54667.1	EAR97252.1	CBH17522.1	EGF78577.1	EGF78577.1	XP_786168.3	AAQ11377.1
CBJ27270.1	conserved unknown protein	function unknown protein
CBJ33842.1	conserved unknown protein	pogo transposable element with krab domain
CBJ26305.1	protein phosphatase 2A regulatory subunit	serine threonine-protein phosphatase 2a 65 kda regulatory subunit a beta isoform-like	EGB11876.1	XP_002292618.1	XP_002184078.1	XP_002907105.1	CDF34104.1	BAM79136.1	XP_001697300.1	XP_003055021.1	XP_003080305.1		92927|estExt_fgenesh1_pm.C_1000003	EKX34071.1	EAS04459.2		NP_594948.1	EGF77579.1	XP_788240.3	ACA06046.1
CBN78634.1	conserved unknown protein	calpain-like protein				XP_002898060.1
CBJ29687.1	Isocitrate lyase (Isocitrase) (Isocitratase) (ICL)	isocitrate lyase	EGB08285.1	XP_002295742.1	XP_002182169.1	XP_002904993.1			XP_001695331.1			BAE98549.1		EKX40115.1	EAR82466.1		NP_595067.1	EGF76567.1
CBN77206.1	Heat Shock transcription factor	heat shock transcription factor
CBN79610.1	hypothetical protein Esi_0271_0041	hypothetical protein Esi_0271_0041
CBJ29580.1	galactose-4-epimerase, UDP	udp-glucose 4-epimerase	EGB07474.1	XP_002295981.1	XP_002185705.1		CDF32840.1	BAM78758.1	XP_001698706.1	XP_003058341.1	XP_003080726.1		85710|estExt_fgenesh1_pg.C_50284	EKX50305.1	EAR99444.1	XP_828356.1	NP_596043.1	EGF77094.1	XP_003726036.1	2201313A
CBJ27457.1	conserved unknown protein	ef hand family protein
CBN78008.1	hypothetical protein Esi_0082_0014	hypothetical protein Esi_0082_0014
CBJ26771.1	conserved unknown protein	radial spoke head protein 9 homolog	EGB03271.1			XP_002902497.1							45947|estExt_Genewise1.C_10174		EAR91081.2				XP_780230.2	CAC19508.1
CBJ48537.1	conserved unknown protein (Partial)	function unknown protein
CBN78393.1	flagellar outer dynein arm-docking complex	flagellar outer dynein arm-docking complex protein 1	EGB12807.1	XP_002290257.1					XP_001701436.1	XP_003058756.1			45787|e_gw1.169.2.1	EKX50188.1				EGF77545.1	XP_796220.3
CBN75166.1	conserved unknown protein	flagellar outer dynein arm-docking complex protein 1	EGB05768.1	XP_002290655.1
CBJ48434.1	hypothetical protein Esi_0002_0243	hypothetical protein Esi_0002_0243
CBN75772.1	hypothetical protein Esi_0174_0041	hypothetical protein Esi_0174_0041
CBJ27319.1	expressed unknown protein	wdr26 protein										BAB09052.1
CBJ30964.1	conserved unknown protein	function unknown protein				XP_002908151.1
CBN79061.1	Mannosyl-oligosaccharide 1,2-alpha-mannosidase, family GH47	mannosyl-oligosaccharide alpha- -	EGB09525.1	XP_002289678.1	XP_002176357.1	XP_002901095.1	CDF41161.1	BAM79428.1	XP_001700094.1	XP_003060259.1	CAY09773.1	CAY09746.1	54798|estExt_Genewise1Plus.C_430058	EKX48838.1		CBH13310.1	NP_594139.2	EGF80968.1	XP_797304.3	1FMIA
CBJ26926.1	hypothetical protein Esi_0050_0074	hypothetical protein Esi_0050_0074
CBN76122.1	conserved unknown protein (Partial)	strawberry notch-like protein	EGB03272.1	XP_002287660.1					XP_001692473.1	XP_003061098.1									XP_003725975.1
CBJ26295.1	conserved unknown protein	function unknown protein	EGB04833.1	XP_002289237.1	XP_002177020.1			BAM82034.1						EKX54141.1
CBJ31173.1	hypothetical protein Esi_0237_0008	hypothetical protein Esi_0237_0008
CBN78148.1	conserved unknown protein	enolase	EGB09778.1	XP_002290311.1	XP_002185511.1	XP_002899300.1	CDF36425.1	BAM80509.1	XP_001702971.1	XP_003056091.1	XP_003074214.1		52038|estExt_Genewise1Plus.C_50028	EKX48236.1	EAR94453.1	1OEPA	NP_595903.1	EGF81098.1	XP_003726238.1	3B97A
CBJ32677.1	BiP	78 kda glucose-regulated protein precursor
CBJ34064.1	Dynein heavy chain family	dynein gamma flagellar outer arm
CBJ25616.1	Ankyrin, TRAF-type zinc finger protein	tnf receptor-associated factor 4
CBN79933.1	conserved unknown protein	zinc finger protein		XP_002296773.1	XP_002178737.1	XP_002999091.1						AAM64442.1
CBN78346.1	villin	protein flightless-1
CBJ49020.1	conserved unknown protein	ptype atpase	EGB04533.1			XP_002899918.1
CBN76571.1	metallo-beta-lactamase superfamily protein	metallo-beta-lactamase				XP_002909002.1
CBJ32553.1	hypothetical protein Esi_0346_0039	hypothetical protein Esi_0346_0039
CBJ27327.1	conserved unknown protein	nb-arc and tpr repeat-containing protein
CBJ27373.1	conserved unknown protein	conserved unknown protein				XP_002906755.1
CBJ32668.1	expressed unknown protein	expressed unknown protein
CBN75085.1	conserved unknown protein	ef hand family protein	EGB05765.1	XP_002296366.1							XP_003079022.1
CBJ27106.1	similar to Dynein heavy chain 3, axonemal (Axonemal beta dynein heavy chain 3) (Ciliary dynein heavy chain 3), partial	dynein heavy chain axonemal
CBN76998.1	conserved unknown protein	ecotropic viral integration site 5 protein homolog
CBJ26861.1	conserved unknown protein	function unknown protein
CBJ32365.1	conserved unknown protein	kinesin family member 3c
CBJ49096.1	calmodulin-binding WW domain protein	calmodulin-binding ww domain protein
CBN78362.1	conserved unknown protein	hect e3 ubiquitin
CBN74486.1	conserved unknown protein	acetyltransferase (isoleucine patch superfamily protein)
CBJ29830.1	conserved unknown protein	soluble nsf attachment protein receptor	EGB10062.1
CBJ32648.1	viral A-type inclusion protein	viral a-type inclusion protein
CBN75015.1	NB-ARC and TPR repeat-containig protein	tfp pilus assembly protein
ABY66163.1	origin-binding protein	replication origin-binding protein
CBJ26280.1	hypothetical protein Esi_0029_0056	hypothetical protein Esi_0029_0056
CBN79249.1	WD repeat protein	wd repeat-containing protein 52				ABD60575.1														NP_001157968.1
CBJ30186.1	conserved unknown protein	function unknown protein
CBN78653.1	hypothetical protein Esi_0141_0038	hypothetical protein Esi_0141_0038
CBJ29609.1	Trehalose 6-phosphate synthase, family GT20 / Trehalose 6-phosphate phosphatase	trehalose-6-phosphate synthase	EGB06005.1	XP_002288483.1	XP_002180425.1	XP_002903649.1	CDF40277.1	BAM80147.1		XP_003054914.1	XP_003082388.1			EKX47629.1			NP_594430.1	EGF78203.1
CBJ48949.1	conserved unknown protein	si:ch211- protein
CBJ31384.1	conserved unknown protein	tubulin-tyrosine ligase family				XP_002904523.1			BAI67941.1				92883|estExt_fgenesh1_pm.C_900003		EAR96865.1	CBH16602.1			XP_781338.1
CBJ48982.1	ankyrin repeat domain protein	ankyrin repeat protein	EGB11723.1						XP_001698493.1			BAE99776.1			EAS06627.1				XP_003725772.1
CBJ34066.1	hypothetical protein Esi_0929_0001	hypothetical protein Esi_0929_0001
CBJ31249.1	conserved unknown protein	nipped-b-like protein
CBJ28807.1	conserved unknown protein	calcineurin subunit b				XP_002908594.1
CBJ48736.1	conserved unknown protein	set domain containing protein
CBJ28896.1	similar to protein phosphatase 1, catalytic subunit, gamma isoform isoform 2	serine threonine-protein phosphatase pp1-gamma catalytic subunit
CBN78805.1	conserved unknown protein	nuclear segregation protein		XP_002288931.1	XP_002183698.1
CBN78900.1	conserved unknown protein	annexin a6 isoform 1	EGB06118.1																XP_792294.2
CBJ29013.1	DnaJ domain containing protein	hypotherical protein
CBN76039.1	conserved unknown protein	eukaryotic translation initiation factor 2-alpha
CBJ27566.1	conserved unknown protein	myosinlike protein		XP_002296378.1	ACS35544.1				XP_001696752.1					EKX34711.1
CBJ29665.1	SUDD-like protein	rio kinase	EGB06977.1	XP_002287150.1	XP_002184976.1	XP_002897130.1		BAM79668.1		XP_003063738.1	XP_003082830.1		89624|estExt_fgenesh1_pg.C_520129	EKX41250.1	EAR94610.1	CBH10267.1	NP_593261.2	EGF82498.1	XP_793660.3	CAD38952.1
CBN75980.1	conserved unknown protein	p-loop containing nucleoside triphosphate hydrolase protein	EGB12947.1			XP_002903508.1			XP_001692158.1
CBJ48959.1	conserved unknown protein	nucleolar protein 6				XP_002903734.1								EKX49904.1
CBJ31704.1	conserved unknown protein	cap-gly domain-containing linker protein 3
CBJ29317.1	conserved unknown protein	ran-binding protein
CBJ28028.1	Acetoacetate--CoA ligase	acetoacetyl- synthase	EGB12774.1			XP_002899141.1	CDF37376.1	BAM83382.1										EGF76199.1	XP_795289.2	AAH04997.1
CBN80154.1	expressed unknown protein	expressed unknown protein																		EAW92165.1
CBJ18018.1	cytochrome oxidase subunit I	cytochrome c oxidase subunit 1		AAZ99394.1	ADY18508.1	AAF24774.1|U17009_6	CAA87603.1	BAA34660.1	1302139A	ACO50727.1	CAL36410.1	CAA69785.1				CAB57806.1	P07657.4|COX1_SCHPO		CAA31153.1	BAE15544.1
CBN78071.1	conserved unknown protein	tubulin polyglutamylase ttll5-like
CBN77702.1	conserved unknown protein	pi-plc x domain-containing protein 3-like
CBN79728.1	RecName: Full=Mitogen-activated protein kinase kinase kinase A; AltName: Full=MAPK/ERK kinase 1; Short=MEK kinase 1; Short=MEKK 1; AltName: Full=MAPK/ERK kinase A; Short=MEK kinase A; Short=MEKK A; Sh	mitogen-activated protein kinase kinase kinase anp1-like
CBN79292.1	hypothetical protein Esi_0196_0057	hypothetical protein Esi_0196_0057
CBN78817.1	hypothetical protein Esi_0145_0025	hypothetical protein Esi_0145_0025
CBN78675.1	conserved unknown protein	coiled-coil domain containing 147	EGB05434.1			XP_002897474.1
CBN78613.1	hypothetical protein Esi_0137_0063	hypothetical protein Esi_0137_0063
CBN78602.1	membrane acyl-CoA binding protein	ankyrin repeat-rich vertebrate like protein
CBN80217.1	conserved unknown protein	function unknown protein	EGB08998.1			XP_002902474.1
CBN78348.1	conserved unknown protein	protein phosphatase 2c 51												EKX46159.1
CBN79531.1	conserved unknown protein	protein kinase-like protein	EGB03720.1	XP_002288085.1	XP_002184068.1	XP_002909171.1	CDF34307.1	BAM82092.1	XP_001702056.1	XP_003062839.1	XP_003074327.1	AAL32577.1	92566|estExt_fgenesh1_pm.C_320015	EKX35058.1	EAR87479.1	CAA52688.1	NP_595739.1	EGF77708.1	XP_001200924.2	AAB59449.1
CBN76709.1	bromodomain-containing protein	bromodomain-containing protein
CBN76577.1	conserved unknown protein	voltagegated ion channel superfamily
CBN75453.1	EsV-1-7	n/a
CBN73979.1	hypothetical protein Esi_0009_0152	hypothetical protein Esi_0009_0152
CBN75305.1	conserved unknown protein	function unknown protein	EGB11511.1	XP_002285989.1			CDF38506.1		XP_001690406.1	XP_003059640.1	XP_003080509.1	AAL60029.1	146612|aug1.118_g21320	EKX50672.1
CBN75116.1	dynein intermediate chain family	wd repeat domain 78				XP_002895941.1							85924|estExt_fgenesh1_pg.C_70029
CBN74956.1	cytochrome P450	cytochrome p450
CBN74902.1	conserved unknown protein	function unknown protein	EGB06603.1	XP_002290493.1	XP_002184781.1	XP_002905441.1	CDF35435.1	BAM82414.1	XP_001702917.1	XP_003058275.1	XP_003080249.1		91444|estExt_fgenesh1_pg.C_1010013	EKX36430.1	EAR97401.1	AAX69952.1	NP_595256.1	EGF76972.1	XP_793717.2	1DIAA
CBN76110.1	similar to neurobeachin like 1	neurobeachin-like protein 1-like
CBN76034.1	conserved unknown protein	conserved unknown protein	EGB12920.1			XP_002904163.1			XP_001696207.1				87328|estExt_fgenesh1_pg.C_190064	EKX33963.1	EAR88491.1
CBN74449.1	conserved unknown protein	conserved unknown protein
CBN75930.1	conserved unknown protein	anoctamin-10 isoform 4		XP_002286402.1	XP_002183848.1	XP_002907934.1														CAI93606.1
CBN75761.1	conserved unknown protein	conserved unknown protein
CBN75740.1	NB-ARC and TPR repeat-containing protein	nb-arc and tpr repeat-containing protein
CBN75609.1	conserved unknown protein	nudix (nucleoside diphosphate linked moiety x)-type motif 1	EGB12835.1		XP_002181189.1	XP_002899283.1		BAM80977.1	XP_001696863.1	XP_003061519.1	XP_003082844.1				EAR95349.1				XP_792556.2	BAA83791.1
CBJ27891.1	conserved unknown protein	s-adenosyl-l-methionine-dependent methyltransferase-like
CBJ25705.1	conserved unknown protein	nuclear condensin complex subunit smc4										AED95695.1
CBJ33628.1	conserved unknown protein	abc transporter						BAM79983.1			XP_003078892.1
CBJ26874.1	ATP synthase: assembly factor for F1 component	atp10 protein												EKX51868.1
CBJ26853.1	conserved unknown protein	function unknown protein
CBJ33223.1	protein phosphatase 2C	protein phosphatase 2c
CBJ33052.1	conserved unknown protein	conserved unknown protein
CBJ26517.1	expressed unknown protein	expressed unknown protein
CBJ32385.1	conserved unknown protein	sam domain family protein
CBJ32053.1	conserved unknown protein	conserved unknown protein	EGB08527.1			XP_002906373.1
CBJ32040.1	conserved unknown protein	conserved unknown protein				XP_002906024.1
CBJ25575.1	hypothetical protein Esi_0003_0246	hypothetical protein Esi_0003_0246
CBJ25526.1	conserved unknown protein	function unknown protein
CBJ31848.1	conserved unknown protein	phd finger protein 15
CBJ31648.1	hypothetical protein Esi_0270_0042	hypothetical protein Esi_0270_0042
CBJ31524.1	similar to regulator of G-protein signaling 16	regulator of g-protein signaling 16
CBJ31415.1	conserved unknown protein	mitogen-activated protein kinase kinase 2	EGB05746.1	XP_002296732.1	XP_002176764.1	XP_002908751.1	CDF39666.1		XP_001696437.1	XP_003059610.1	XP_003078923.1	BAA28828.1	52308|estExt_Genewise1Plus.C_70039	EKX53809.1	EAR90874.1	AAX69304.1	EGF78919.1	EGF77706.1	XP_786275.3	3SLSB
CBJ31209.1	similar to deubiquitinating enzyme 3	ubiquitin carboxyl-terminal hydrolase
CBJ31176.1	putative scytonemin-related tyrosinase	scytonemin-related tyrosinase	EGB08572.1
CBJ31175.1	conserved unknown protein	gnat family		XP_002288329.1			CDF39684.1						92757|estExt_fgenesh1_pm.C_650002	EKX53078.1			NP_594501.1
CBJ30895.1	component of dynein regulatory complex	growth arrest-specific protein 8	EGB09206.1			XP_002908606.1			AAP57169.1	XP_003056383.1			38544|e_gw1.26.39.1	EKX51344.1	EAR84655.2	CBH14855.1			XP_782050.2	BAH12677.1
CBJ30824.1	hypothetical protein Esi_0216_0050	hypothetical protein Esi_0216_0050
CBJ48439.1	Hypothetical leucine rich repeat and MORN domain-containing protein	morn repeat protein
CBJ30522.1	conserved unknown protein	hypothetical leucine rich repeat calcium binding protein
CBJ30466.1	conserved unknown protein	abc1 family protein					CDF36728.1
CBJ30426.1	hypothetical protein Esi_0189_0059	hypothetical protein Esi_0189_0059
CBJ30051.1	conserved unknown protein	cytoskeleton-associated protein 5				XP_002898905.1
CBJ25956.1	Aquarius intron-binding protein similar to aquarius	intron-binding protein aquarius		XP_002290040.1	XP_002179005.1	XP_002997290.1	CDF33787.1		XP_001691434.1	XP_003056310.1	XP_003079160.1		85349|estExt_fgenesh1_pg.C_30315	EKX39148.1				EGF81510.1	XP_003725465.1	BAA25486.3
CBJ25788.1	conserved unknown protein	atpase family aaa domain-containing protein 1				XP_002997321.1	CDF39216.1	BAM81416.1		XP_003055969.1	XP_003078097.1			EKX32563.1			NP_588013.1	EGF77198.1
CBJ29525.1	hypothetical protein Esi_0150_0004	hypothetical protein Esi_0150_0004
CBJ49075.1	Hydrocephalus-inducing protein, Hydin-like protein	hydrocephalus-inducing protein homolog	EGB10058.1
CAT18807.1	Light-independent protochlorophyllide reductase subunit B	light-independent protochlorophyllide reductase subunit b							CAA35763.1
CBJ32185.1	EF-hand, calcium binding motif	ef hand family protein
CBN76657.1	expressed unknown protein	expressed unknown protein
CBJ33178.1	L-ascorbate peroxidase	ascorbate peroxidase	EGB12024.1	XP_002291359.1	XP_002181744.1	XP_002909090.1	CDF36806.1	BAI45176.1	CAA11265.1	XP_003061639.1	XP_003074417.1	BAF01533.1		EKX41624.1	EAR99384.1			EGF82871.1
CBJ48390.1	flagellar associated protein	flagellar associated protein
CBJ33287.1	conserved unknown protein	neurofilament triplet l		XP_002289840.1		XP_002898111.1								EKX49393.1	EAR88638.1
CBJ49101.1	outer dynein arm docking complex protein like	flagellar outer dynein arm-docking complex protein 1	EGB09472.1			XP_002907344.1									EAR91604.2
CBN80237.1	conserved unknown protein	function unknown protein										AAD50043.1|AC007980_8
CBJ26379.1	hypothetical protein Esi_0032_0101	hypothetical protein Esi_0032_0101
CBJ27557.1	conserved unknown protein	kinesinlike protein
CBJ25638.1	conserved unknown protein	major facilitator superfamily	EGB12316.1		XP_002180494.1	XP_002900526.1				XP_003056972.1
CBJ26209.1	hypothetical protein Esi_0027_0085	hypothetical protein Esi_0027_0085
CBN75005.1	hypothetical protein Esi_0064_0048	hypothetical protein Esi_0064_0048
CBJ32601.1	expressed unknown protein	expressed unknown protein
CBN78469.1	conserved unknown protein	function unknown protein	EGB05501.1	XP_002291064.1	XP_002179869.1				XP_001694445.1	XP_003064916.1	XP_003082519.1		58249|fgenesh1_pm.67_#_11	EKX36256.1					XP_794454.3	BAG36976.1
CBN77602.1	hypothetical protein Esi_0004_0241	hypothetical protein Esi_0004_0241
CBJ33997.1	conserved unknown protein	serine threonine protein kinase								XP_003057954.1				EKX45990.1
CBJ31412.1	conserved unknown protein	tubulin-tyrosine ligase family protein	EGB07786.1			XP_002906023.1				XP_003061938.1
CBJ27239.1	conserved unknown protein	transmembrane protein
CBJ32590.1	pseudouridine synthase	pseudouridylate synthase 7 homolog								XP_003056796.1
CBJ33154.1	conserved unknown protein	laminin subunit beta-2-like				XP_002999302.1							90780|estExt_fgenesh1_pg.C_790038
CBJ32191.1	conserved unknown protein	conserved unknown protein
CBJ28633.1	SNF2 helicase	e3 ubiquitin-protein ligase shprh
CBJ28578.1	TiTiN family member (ttn-1)	in family member (ttn-1)
CBN74090.1	hypothetical protein Esi_0012_0173	hypothetical protein Esi_0012_0173
CBN79559.1	expressed unknown protein	expressed unknown protein
CBN77511.1	conserved unknown protein	conserved unknown protein
CBN77371.1	conserved unknown protein	tubulin-tyrosine ligase family protein
CBN78335.1	flagellar associated protein	tetratricopeptide repeat protein 21b	EGB05025.1			XP_002902627.1			XP_001696517.1	XP_003057410.1				EKX43904.1					XP_793431.3	AAH55424.1
CBN78315.1	ATP-binding cassette superfamily	atp-binding cassette superfamily														CBH13236.1			AFH89643.1
CBN77275.1	expressed unknown protein	expressed unknown protein
CBN79404.1	conserved unknown protein	centrosomal protein of 290 kda
CBN78985.1	conserved unknown protein	conserved unknown protein	EGB05137.1			XP_002904298.1								EKX46557.1
CBN78818.1	conserved unknown protein	condensin-2 complex subunit g2			XP_002178944.1	XP_002907482.1			XP_001696307.1					EKX42521.1					XP_788126.1	EAX04585.1
CBN78623.1	conserved unknown protein	function unknown protein
CBN78457.1	hypothetical protein Esi_0121_0054	hypothetical protein Esi_0121_0054
CBN79560.1	conserved unknown protein	n/a
CBN78176.1	Glutamate synthase (NADH/NADPH-dependent), C-terminal part	glutamate synthase	EGB05270.1	XP_002293590.1	XP_002184279.1	XP_002901469.1	CCP38221.1	BAC76145.1	XP_001693082.1	XP_003057676.1	XP_003083015.1		58085|fgenesh1_pm.52_#_14	EKX35717.1			NP_594133.1	EGF82904.1	XP_001184639.2
CBN76623.1	conserved unknown protein	baculoviral iap repeat-containing protein 6
CBN76605.1	Heat shock protein 40 like protein/ DnaJ domain containing protein	chaperone protein
CBN73887.1	conserved unknown protein	ring zinc finger-containing protein
CBN74880.1	conserved unknown protein	copine-5
CBN74395.1	conserved unknown protein	u5 small nuclear ribonucleoprotein 200 kda helicase	EGB08212.1	XP_002295908.1	XP_002181230.1	XP_002897617.1	CDF39527.1	BAM82053.1	XP_001703610.1	XP_003061521.1	XP_003081937.1		53194|estExt_Genewise1Plus.C_160133	EKX54104.1	EAS04385.1	CBH17383.1	NP_593346.1	EGF82711.1	XP_003728286.1	BAA34508.2
CBJ27930.1	conserved unknown protein	80 kda mcm3-associated protein
CBJ25651.1	possible ABC-like PK	abc-1 domain-containing protein	EGB03225.1	XP_002290460.1	XP_002181031.1		CDF35168.1	BAM80680.1	XP_001698695.1	XP_003058221.1	XP_003080369.1	AAF68128.1|AC010793_23	44840|e_gw1.104.3.1	EKX49870.1
CBJ27374.1	similar to ankyrin 2,3/unc44	ankyrin repeat protein				XP_002908403.1						AAS49051.1
CBJ27230.1	conserved unknown protein	translocator of the inner chloroplast envelope membrane 110k
CBJ48847.1	Soluble NSF Attachment Protein (SNAP) Receptor (SNARE)	qa- syp4 tlg2p syntaxin 16-type	EGB09176.1	XP_002287838.1	XP_002185756.1	XP_002908136.1	CDF41396.1	BAM79716.1	XP_001690837.1	XP_003062153.1	XP_003079971.1	BAF01182.1	87429|estExt_fgenesh1_pg.C_200101	EKX52318.1				EGF78310.1	XP_003724921.1	NP_001191797.1
CBJ33456.1	conserved unknown protein	function unknown protein
CBJ26686.1	conserved unknown protein	ricin-containing lipase tectonin-like protein
CBJ32852.1	NB-ARC and TPR repeat-containing protein-likely pseudogene	nb-arc and tpr repeat-containing protein	EGB06807.1
CBJ32574.1	conserved unknown protein	kinesin k39
CBJ32416.1	expressed unknown protein	expressed unknown protein
CBJ32409.1	hypothetical protein Esi_0337_0010	hypothetical protein Esi_0337_0010
CBJ32356.1	conserved unknown protein	function unknown protein
CBJ26407.1	conserved unknown protein	conserved unknown protein
CBJ31699.1	expressed unknown protein	expressed unknown protein
CBJ26220.1	expressed unknown protein	expressed unknown protein
CBJ26199.1	LRR-GTPase of the ROCO family	lrr-gtpase of the roco family
CBJ49245.1	conserved unknown protein	ddb1- and cul4-associated factor 8-like				XP_002904071.1							139121|aug1.48_g13829	EKX54650.1					XP_785904.3
CBJ48503.1	expressed unknown protein	expressed unknown protein
CBJ31062.1	putative, spindle assembly abnormal protein 6	spindle assembly abnormal protein 6 homolog				XP_002998173.1				XP_003055908.1								EGF78297.1		CAH72248.1
CBJ30515.1	kinesin K39	kinesin k39
CBJ30503.1	conserved unknown protein	cold shock domain-containing protein e1-like
CBJ30420.1	calcium-dependent protein kinase	calcium-dependent protein
CBJ30276.1	conserved unknown protein	rac-beta serine threonine-protein kinase-				XP_002908110.1	CDF36932.1
CBJ29876.1	conserved unknown protein	conserved unknown protein
CBJ28687.1	conserved unknown protein	kif1-binding protein homolog
CBJ28673.1	conserved unknown protein	conserved unknown protein
CBJ48999.1	trithorax 3	histone-lysine n-methyltransferase atx3
CBJ28634.1	conserved unknown protein	family protein
CBN79394.1	Molecular chaperones HSP70/HSC70, HSP70 superfamily	heat shock protein 70	EGB12199.1							XP_003064239.1	XP_003083987.1		50519|estExt_Genewise1.C_820019				NP_588421.1
CBN75721.1	conserved unknown protein	conserved unknown protein	EGB06203.1	XP_002289911.1					XP_001694675.1	XP_003059217.1			50099|estExt_Genewise1.C_670001	EKX31396.1	EAR89260.1				XP_784094.1
CBJ28163.1	conserved unknown protein	flagellar associated protein																	XP_796198.3
CBN78272.1	Zinc finger, C2H2 type family protein	protein fam164c-like
CBJ27360.1	hypothetical protein Esi_0067_0046	hypothetical protein Esi_0067_0046
CBN77061.1	conserved unknown protein	c-myc binding protein	EGB12182.1	XP_002285940.1	XP_002180381.1				XP_001699752.1	XP_003057151.1		BAC43721.1	89190|estExt_fgenesh1_pg.C_450055	EKX32829.1	EAR95438.1	CBH14429.1		EGF79814.1	XP_797203.3	CAG33217.1
CBJ33599.1	conserved unknown protein	conserved unknown protein
CBJ32683.1	conserved unknown protein	conserved unknown protein
CBJ30123.1	conserved unknown protein	ubiquitin carboxyl-terminal hydrolase family protein				XP_002997016.1
CBN75297.1	conserved unknown protein	kinesin-ii 95 kda
CBJ28360.1	conserved unknown protein	conserved tpr domain protein
CBJ26706.1	ankyrin repeat domain protein	ankyrin repeat protein
CBJ27438.1	Hypothetical leucine rich repeat calmodulin binding protein	hypothetical leucine rich repeat calmodulin binding protein					CDF39340.1
CBJ30830.1	conserved unknown protein	membrane-associated progesterone receptor component 2		XP_002286676.1								AAD23019.1
CBN73956.1	basal body protein	basal body protein
CBJ27696.1	conserved unknown protein	serine threonine-protein
CBJ27464.1	UDP-glucose:glycoprotein glucosyltransferase, N-terminal fragment, family GT24	udp-glucose:glycoprotein glucosyltransferase
CBJ33724.1	hypothetical protein Esi_0571_0007	hypothetical protein Esi_0571_0007
CBN77248.1	conserved unknown protein	condensin complex subunit 1		XP_002286183.1	XP_002186078.1													EGF84008.1	XP_001197759.1
CBN73772.1	hypothetical protein Esi_0007_0016	hypothetical protein Esi_0007_0016
CBJ33597.1	conserved unknown protein	polymorphic outer membrane protein g i family
CBJ31269.1	ubiquitin carboxyl-terminal hydrolase 64E	ubiquitin carboxyl-terminal hydrolase 47
CBJ31355.1	Heat Shock transcription factor	heat shock factor protein										BAB11313.1							XP_795762.3	BAG57805.1
CBJ29368.1	zinc finger, CW-type with coiled-coil domain 3	morc family cw-type zinc finger protein 3
CBN78795.1	hypothetical protein Esi_0006_0205	hypothetical protein Esi_0006_0205
CBN77554.1	hypothetical protein (Partial)	hypothetical protein (Partial)
CBN78110.2	Heat Shock transcription factor (Partial)	heat shock transcription factor
CBN77982.1	argininosuccinate lyase	argininosuccinate lyase	EGB07165.1	XP_002291698.1	XP_002178853.1	AAN31472.1	CDF35875.1	BAM80586.1	S78597	XP_003055265.1	XP_003082446.1	CAB96847.1	58517|fgenesh1_pm.102_#_2	EKX48973.1			NP_596817.1	EGF84200.1	XP_780183.3	AAH08195.1
CBN77922.1	Glycosyltransferase, family GT64	function unknown protein	EGB03345.1		XP_002181521.1			BAM79674.1	XP_001691030.1	XP_003058826.1	XP_003082678.1	BAF00425.1
CBN77747.1	conserved unknown protein	possible vacuolar protein	EGB04652.1
CBN78737.1	expressed unknown protein	expressed unknown protein
CBN77481.1	hypothetical protein Esi_0059_0120	hypothetical protein Esi_0059_0120
CBN77176.1	hypothetical protein Esi_0038_0032	hypothetical protein Esi_0038_0032
CBN79785.1	GJ12915	protein phosphatase	EGB10263.1										131205|aug1.13_g5913	EKX49368.1	EAS03169.1	AAX79767.1
CBN79744.1	conserved unknown protein	t-complex protein 1 subunit theta		XP_002291129.1	XP_002184870.1	XP_002907404.1	CDF32243.1	BAM83283.1	XP_001703339.1	XP_003055741.1	XP_003078262.1	AAQ56831.1	51243|estExt_Genewise1.C_1250017	EKX45203.1	EAR86406.2	XP_823053.1	NP_595406.1	EGF84485.1	XP_788106.2	CAB90433.1
CBN78522.1	expressed unknown protein	function unknown protein
CBN79211.1	TYRosinase family member (tyr-4)	ortho-aminophenol oxidase	EGB07698.1
CBN76485.1	outermembrane protein	kelch repeat type 1-containing protein
CBN73926.1	hypothetical protein Esi_0009_0056	hypothetical protein Esi_0009_0056
CBN74747.1	expressed unknown protein	expressed unknown protein
CBN76203.1	hypothetical protein (Partial)	hypothetical protein (Partial)
CBN74257.1	EsV-1-7	n/a
CBN75785.1	flagellar protofilament ribbon protein	flagellar protofilament ribbon protein
CBJ33832.1	conserved unknown protein	lao ao transport system atpase		XP_002286174.1	XP_002180577.1									EKX44788.1					XP_796447.2	2WWWA
CBJ27178.1	conserved unknown protein	conserved unknown protein
CBJ48903.1	hypothetical protein Esi_0057_0075	hypothetical protein Esi_0057_0075
CBJ48636.1	Trehalose 6-phosphate synthase, family GT20 / Trehalose 6-phosphate phosphatase	trehalose-6-phosphate synthase
CBJ48622.1	NB-ARC and TPR repeat-containing protein	nb-arc and tpr repeat-containing protein
CBJ32744.1	conserved unknown protein	septum site-determining protein		XP_002292209.1		XP_002899233.1
CBJ32705.1	serine/threonine kinase, putative	isoform cra_a
CBJ26371.1	similar to Probable phospholipid-transporting ATPase ID (ATPase class I type 8B member 2)	phospholipid-transporting atpase 3	EGB04767.1			XP_002906366.1		BAM82518.1	XP_001697830.1			AAD39325.1|AC007258_14		EKX38131.1	EAR84260.2		NP_596486.1	EGF82895.1	XP_001200260.2	BAG58498.1
CBJ31560.1	conserved unknown protein	bis(5 -nucleosyl)- symmetrical
CBJ48552.1	conserved unknown protein	protein kinase
CBJ49210.1	expressed unknown protein	expressed unknown protein
CBJ29742.1	Histone hairpin binding protein	histone gene transcript 5 hairpin-binding protein
CBN75111.1	p28, 28 kDa light chain of axonemal inner dynein arms	axonemal dynein light chain p33	EGB12520.1			XP_002898370.1				XP_003060118.1			130551|aug1.11_g5259	EKX52488.1	EAS06995.1	CBH17504.1		EGF80122.1	AAC47111.1	AAH46117.1
CBN76676.1	conserved unknown protein	function unknown protein				XP_002899461.1				XP_003055769.1	XP_003078247.1			EKX53681.1
CBN76027.1	actin-1	actin
CBN76850.1	expressed unknown protein	expressed unknown protein
CBN75112.1	expressed unknown protein	axonemal dynein light chain p33
CBN74045.1	centrin	caltractin	EGB10261.1	XP_002296199.1	XP_002185049.1	XP_002900655.1	CDF32250.1	BAM79267.1	CAA31163.1	XP_003056852.1	XP_003074444.1	CAH23399.1	92750|estExt_fgenesh1_pm.C_620013	EKX46137.1	EAR99047.1	AAX70350.1	NP_587797.1	EGF76367.1	XP_001177362.1	CAE93929.1
CBN76611.1	GPA4, alpha subunit of a heterotrimeric G protein	g-protein subunit alpha 8
CBJ28197.1	ARL6L, ARF-like Ras superfamily GTPase	adp-ribosylation factor-like protein 6-like
CBN78919.1	Peroxyredoxin	tsa family protein	EGB12626.1	XP_002292020.1	XP_002182930.1		CDF34846.1	BAM81225.1	XP_001698498.1	XP_003060416.1	XP_003082173.1	CAB86900.1		EKX53000.1			NP_587706.1	EGF82831.1	XP_796387.3	AAF04856.1|AF197952_1
CBN77292.1	conserved unknown protein	coiled-coil domain-containing protein 135	EGB03603.1	XP_002291540.1		XP_002906555.1				XP_003057247.1				EKX54526.1			EGF78899.1	EGF78899.1		BAC04026.1
CBJ25596.1	malate dehydrogenase	nadp-dependent malic enzyme	EGB07048.1	XP_002290550.1	XP_002180331.1	XP_002896607.1	CDF39241.1	BAM80193.1	XP_001696415.1	XP_003060431.1	XP_003080199.1	AAL31209.1	127155|aug1.4_g1863	EKX51367.1		CBH17497.1	NP_587760.1		XP_780686.3	CAA55956.1
CBJ27486.1	conserved unknown protein	ef hand family protein
CBN75735.1	conserved unknown protein	conserved unknown protein
CBN79789.1	conserved unknown protein	inactive ubiquitin carboxyl-terminal hydrolase 54
CBJ48559.1	hypothetical protein Esi_0025_0128	hypothetical protein Esi_0025_0128
CBJ26670.1	expressed unknown protein	expressed unknown protein
CBJ28610.1	conserved unknown protein	nuclear lim factor interactor-interacting protein cleavage-specific form	EGB04357.1	XP_002289784.1	XP_002176647.1	AAV63937.1	CDF32755.1	BAM79279.1	XP_001695470.1		XP_003082437.1		37432|e_gw1.19.90.1	EKX46023.1	EAS00600.1	AAX80246.1	NP_592973.1	EGF83028.1	XP_003728694.1	CAE11805.1
CBJ33084.1	Hypothetical leucine rich repeat calcium binding protein	hypothetical leucine rich repeat calcium binding protein				XP_002997996.1
CBJ26377.1	conserved unknown protein	conserved unknown protein
CBJ28994.1	expressed unknown protein	expressed unknown protein
CBJ32946.1	conserved unknown protein	conserved oligomeric golgi complex subunit 3
CBN74777.1	hypothetical protein Esi_0041_0144	hypothetical protein Esi_0041_0144
CBJ26674.1	conserved unknown protein	conserved unknown protein											84147|fgenesh1_pg.124_#_17
CBJ26892.1	conserved unknown protein	oligosaccharide translocation protein rft1
CBJ28433.1	Ngdn protein	ngdn protein			XP_002178674.1	XP_002904362.1				XP_003060944.1								EGF80388.1	XP_001197768.2	CAB43232.2
CBJ29159.1	conserved unknown protein	function unknown protein	EGB03205.1			XP_002909485.1
CBJ33641.1	conserved unknown protein	heparan sulfate glucosamine 3-o-sulfotransferase 3a1
CBJ48509.1	Hypothetical leucine rich repeat protein	hypothetical leucine rich repeat protein
CBN76910.1	hypothetical protein Esi_0024_0016	hypothetical protein Esi_0024_0016
CBJ31429.1	hypothetical protein Esi_0255_0023	hypothetical protein Esi_0255_0023
CBN78356.1	hypothetical protein Esi_0112_0024	n/a
CBJ27020.1	conserved unknown protein	autoinhibited calcium atpase	EGB12861.1	XP_002293582.1	XP_002178277.1	XP_002999157.1	CDF38164.1	BAM82230.1	XP_001694546.1	XP_003056805.1	XP_003081200.1			EKX48797.1	EAS06710.1	AAX70324.1	NP_593890.1	EGF77750.1	AAY79170.1
CBJ32547.1	hypothetical protein Esi_0346_0017	hypothetical protein Esi_0346_0017
CBJ29950.1	conserved unknown protein	function unknown protein
CBJ30024.1	hypothetical protein Esi_0171_0039	hypothetical protein Esi_0171_0039
CBJ30068.1	FirrV-1-B30 precursor	n/a
CBN74437.1	similar to TAK1 (TGF-beta-activated kinase)	tak1 (tgf-beta-activated kinase)			XP_002181733.1
CBJ29776.1	expressed unknown protein	expressed unknown protein
CBJ30460.1	conserved unknown protein	tpr repeat-containing protein ddb_g0287407-like
CBN78085.1	conserved unknown protein	calpain-7 (c02 family)		XP_002288957.1		XP_002897717.1								EKX53670.1		CBH17410.1			XP_003729856.1	EAW64224.1
CBN77951.1	Serine/threonine protein kinase/TGF-beta stimulated factor	serine threonine-protein kinase 16			XP_002177071.1	XP_002895305.1				XP_003060182.1		CAB93717.1	77640|fgenesh1_pg.49_#_83					EGF79802.1	XP_796127.2	BAB16311.1
CBN77474.1	conserved unknown protein	function unknown protein
CBN77360.1	expressed unknown protein	expressed unknown protein
CBN77309.1	conserved unknown protein	probable exonuclease mut-7 homolog												EKX41732.1
CBN77274.1	phosphatidylinositol kinase (PIK-5)	serine-protein kinase atm				XP_002909380.1
CBN77571.1	similar to CG7697-PA	myotubularin-related protein 2	EGB11580.1		XP_002184861.1	XP_002906903.1							131414|aug1.14_g6122	EKX40604.1	EAR87507.1		EGF79489.1	EGF79489.1	XP_788958.2	BAG64098.1
CBN77527.1	conserved unknown protein	polyglutamine-binding protein 1
CBN77224.1	conserved unknown protein	ion channel		XP_002296577.1	XP_002182943.1	XP_002901973.1			XP_001699314.1	XP_003057391.1	XP_003079434.1		82374|fgenesh1_pg.91_#_67				NP_588191.1	EGF77214.1
CBN77184.1	conserved unknown protein (Partial)	e3 ubiquitin-protein ligase ubr4
CBN79681.1	Dihydrolipoamide acetyltransferase	dihydrolipoamide s-acetyltransferase (e2 component of pyruvate dehydrogenase complex)	EGB05515.1	XP_002287343.1	XP_002177160.1	XP_002998293.1	CDF40735.1		XP_001695174.1	XP_003057281.1	XP_003079400.1	AAD25602.1|AC005287_4	50387|estExt_Genewise1.C_770010	EKX54570.1	EAR85117.3	XP_822991.1	EGF79449.1	EGF79449.1	XP_782228.3	BAG61505.1
CBN79605.1	conserved unknown protein	voltagegated ion channel superfamily
CBN79461.1	conserved unknown protein	integral membrane protein involved in cell shape determination
CBN76905.1	filamentous temperature sensitive Z	cell division protein	EGB12884.1	XP_002293505.1	XP_002185124.1	XP_002907858.1		BAA85116.1	XP_001700508.1	XP_003058549.1	XP_003080788.1	CAB89236.1	92991|estExt_fgenesh1_pm.C_1360003
CBN79936.1	hypothetical protein Esi_0015_0124	hypothetical protein Esi_0015_0124
CBN79777.1	expressed unknown protein	expressed unknown protein
CBN79774.1	C2 domain containing protein	c2 domain containing protein
CBN78603.1	conserved unknown protein	psp1 family protein															NP_596455.1
CBN78200.1	hypothetical protein Esi_0103_0059	hypothetical protein Esi_0103_0059
CBN79261.1	Myosin light chain kinase (MLCK)	myosin light chain kinase	EGB09853.1		XP_002178623.1
CBN76804.1	conserved unknown protein	function unknown protein		XP_002286817.1						XP_003056290.1			37999|e_gw1.23.136.1
CBN76592.1	WD-40 repeat protein	wd-40 repeat protein
CBN76496.1	conserved unknown protein	conserved unknown protein		XP_002292151.1										EKX44111.1
CBN75340.1	hypothetical protein Esi_0078_0083	hypothetical protein Esi_0078_0083
CBN75219.1	hypothetical protein Esi_0072_0084	hypothetical protein Esi_0072_0084
CBN75154.1	conserved unknown protein	morn repeat protein										AAF16536.1|AC013482_10
CBN75086.1	dynein heavy chain	cytoplasmic dynein 1 heavy chain 1		XP_002295889.1	XP_002185293.1	XP_002907445.1							52380|estExt_Genewise1Plus.C_70193	EKX39168.1	EAR94592.1		EGF78727.1	EGF78727.1	XP_797645.3	BAA20783.3
CBN74963.1	conserved unknown protein	soul heme-binding-like protein		XP_002291840.1	XP_002180145.1		CDF35292.1	BAM78779.1	XP_001693693.1	XP_003055781.1	XP_003078259.1	AAK43920.1|AF370601_1	59923|fgenesh1_kg.7_#_113_#_2542_1_CFAO_EXTA
CBN74693.1	conserved unknown protein	leucine-rich repeat-containing protein
CBN74670.1	similar to asp (abnormal spindle)-like, microcephaly associated	abnormal spindle-like microcephaly-associated protein homolog							XP_001695440.1
CBN74519.1	expressed unknown protein	expressed unknown protein
CBN75826.1	Rieske (2Fe-2S) domain protein	rieske (2fe-2s) domain protein
CBN75587.1	conserved unknown protein	conserved unknown protein
CBN75501.1	conserved unknown protein	function unknown protein	EGB07799.1	XP_002291772.1	XP_002183000.1					XP_003054977.1	XP_003079201.1		72238|fgenesh1_pg.19_#_34
CBJ27986.1	conserved unknown protein	protein xrp2-like
CBJ27711.1	hypothetical protein Esi_0083_0040	hypothetical protein Esi_0083_0040
CBJ25694.1	ATP-binding region, ATPase-like	mhck ef2 kinase domain family protein
CBJ26974.1	conserved unknown protein	cs-domain containing conserved in apicomplexa
CBJ26655.1	conserved unknown protein	fanconi anemia group d2 protein																	XP_798439.2
CBJ48613.1	NB-ARC and TPR repeat-containing protein-likely pseudogene	nb-arc and tpr repeat-containing protein
CBJ32357.1	conserved unknown protein	kinesin-like protein
CBJ32325.1	conserved unknown protein	tpr repeat-containing protein												EKX54714.1
CBJ32137.1	conserved unknown protein	rasgap-activating-like protein 1	EGB04133.1
CBJ25619.1	PObg1, plastid Obg/CgtA-like GTPase 1	function unknown protein	EGB06808.1	XP_002288675.1	XP_002176324.1	XP_002906367.1	CDF36592.1	BAM79652.1	XP_001702482.1	XP_003055203.1	XP_003078221.1	AAM91598.1	67460|fgenesh1_pg.3_#_403	EKX43145.1	EAS01114.1	XP_822978.1	EGF79741.1	EGF79741.1	XP_784849.1	CAE89568.1
CBJ25541.1	conserved unknown protein	uncharacterized conserved protein			XP_002184636.1
CBJ26318.1	Voltage Gated Calcium/Sodium Channel subunit alpha	voltage-gated ion channel superfamily	EGB09265.1	XP_002289136.1		XP_002906745.1			XP_001701446.1	XP_003056815.1
CBJ26303.1	Hypothetical leucine rich repeat protein	histidine kinase a
CBJ31564.1	hypothetical protein Esi_0265_0018	hypothetical protein Esi_0265_0018
CBJ31233.1	gill-specific calpain	gill-specific calpain
CBJ30748.1	conserved unknown protein	wd repeat-containing protein 76-like		XP_002291846.1	XP_002185624.1					XP_003063975.1									XP_797961.3
CBJ30644.1	conserved unknown protein	u1 small nuclear ribonucleoprotein		XP_002287823.1			CDF33300.1					BAD93742.1		EKX33797.1	EAR87066.1				XP_789197.2	EAW95774.1
CBJ49167.1	glutaredoxin	monothiol glutaredoxin-s17	EGB11084.1	XP_002296543.1	XP_002180853.1	XP_002903619.1	CDF36237.1	BAM81985.1	XP_001703697.1	XP_003056668.1	XP_003081198.1		74833|fgenesh1_pg.31_#_60	EKX51991.1			NP_596647.1	EGF84062.1	XP_786413.3	AAF28841.1|AF118649_1
CBJ48326.1	cryptochrome 3	probable bacterial cryptochrome	EGB10801.1	XP_002290958.1	XP_002178889.1		CDF41104.1	BAM78760.1	XP_001701871.1	XP_003062980.1	AAU14279.1	AAL57669.1	79996|fgenesh1_pg.67_#_5	EKX51436.1					XP_783613.3
CBJ30423.1	hypothetical protein Esi_0189_0054	hypothetical protein Esi_0189_0054
CBJ26011.1	conserved unknown protein	conserved unknown protein												EKX55120.1
CBJ30034.1	conserved unknown protein	sulfate permease family			XP_002185176.1
CBJ30016.1	similar to kinesin-related protein	cell wall surface anchor family protein
CBJ29477.1	conserved unknown protein	ankyrin repeat domain-containing protein 13c
CBJ29186.1	conserved unknown protein	conserved unknown protein		XP_002287265.1	XP_002183672.1									EKX38972.1
CBJ29112.1	conserved unknown protein	tpr repeat-containing protein	EGB05245.1
CBJ29039.1	conserved unknown protein	tak1
CBJ49037.1	conserved unknown protein	conserved unknown protein
CBJ28922.1	Hypothetical protein in ptb 5\'region (ORF1)	function unknown protein	EGB02563.1		XP_002184153.1				XP_001703612.1	XP_003058944.1	XP_003080921.1	AEE85801.1	143095|aug1.75_g17803
CBJ28512.1	conserved unknown protein	protein phosphatase 2a regulatory b	EGB05455.1	XP_002290606.1	XP_002179349.1	XP_002998684.1	CDF36270.1	BAM79510.1	XP_001693445.1	XP_003055516.1	XP_003080528.1	AAL60047.1	57855|fgenesh1_pm.32_#_6	EKX48079.1			NP_588206.1	EGF78136.1	XP_780697.2	AAH92477.1
CBN79446.1	beta tubulin	beta-tubulin						BAC67666.1							EAS02761.1		NP_596650.1
CBJ27103.1	ascorbate peroxidase	ascorbate peroxidase											51415|estExt_Genewise1Plus.C_10026
CBJ32104.1	conserved unknown protein	dynein light chain roadblock-type 1	EGB10166.1			XP_002903747.1			XP_001694098.1	XP_003060077.1			53542|estExt_Genewise1Plus.C_210006	EKX54515.1	EAR86622.1	XP_827632.1		EGF80485.1	XP_003724323.1	CAF18131.1
CBN80096.1	cAMP-dependent protein kinase catalytic subunit (PKA)	cgmp-dependent protein
CBJ30928.1	Aldo/Keto Reductase	aldo-keto reductase	EGB11652.1	XP_002295386.1	XP_002185454.1	XP_002907351.1	CDF41015.1	BAM81123.1	XP_001694768.1	XP_003055811.1	XP_003074119.1	AAC23647.1	53723|estExt_Genewise1Plus.C_230093	EKX50778.1	EAR95745.1	BAB17681.1	NP_596843.1	EGF78392.1	XP_792112.1	BAF85772.1
CBN76967.1	radial spoke protein 12	peptidyl-prolyl cis-trans isomerase-like 6-like	EGB12556.1			XP_002908854.1							49581|estExt_Genewise1.C_520023						XP_792119.2	ABC88651.1
CBN78343.1	hypothetical protein Esi_0112_0002	hypothetical protein Esi_0112_0002
CBJ29903.1	GDP-mannose 6-dehydrogenase	udp-glucose 6-dehydrogenase
CBN80306.1	Histidine kinase-like protein	pas pac sensor hybrid histidine kinase												EKX34130.1
CBJ26122.1	conserved unknown protein	upf0704 protein c6orf165 homolog	EGB09634.1			XP_002899895.1							89047|estExt_fgenesh1_pg.C_430006		EAR95929.1					BAC05430.1
CBN79835.1	conserved unknown protein	ankrd44 protein	EGB08605.1			XP_002999187.1		BAM82791.1	XP_001699601.1	XP_003057998.1	XP_003078643.1	AAX89384.1	37200|e_gw1.18.107.1	EKX43945.1	EAS02069.1				XP_001200905.1	AAH50586.2
CBN79530.1	flagellar associated protein	flagellar associated protein	EGB03336.1	XP_002292740.1	XP_002176580.1	XP_002907986.1			XP_001689724.1	XP_003059650.1			74841|fgenesh1_pg.31_#_68	EKX39638.1	EAS05407.1	AAX80432.1		EGF81973.1	XP_797414.1	EAX04266.1
CBJ28879.1	conserved unknown protein	function unknown protein				XP_002899662.1				XP_003056092.1
CBN76131.1	conserved unknown protein	p25-alpha family protein	EGB04412.1						XP_001695016.1	XP_003061031.1			133911|aug1.23_g8619		EAS03354.1	AAX79862.1
CBJ27495.1	flagellar inner arm dynein light chain Tctex1	flagellar inner arm dynein light chain tctex1	EGB06097.1			XP_002903309.1			XP_001702138.1	XP_003062873.1			47870|estExt_Genewise1.C_190127	EKX31768.1	EAR85130.1	CBH17300.1		EGF83505.1	XP_783725.1	BAA09317.1
CBJ27572.1	41 kDa flavoprotein	nadh:flavin oxidoreductase nadh oxidase	EGB08830.1		XP_002179957.1	XP_002909630.1	CDF40340.1		XP_001699408.1	XP_003062818.1		CAA71627.1	92568|estExt_fgenesh1_pm.C_330004		EAR89565.1			EGF76030.1	XP_003731678.1
CBJ29305.1	serine/threonine protein phosphatase	serine threonine protein phosphatase	EGB05129.1	XP_002289328.1	XP_002177230.1	XP_002908542.1	CDF36393.1		XP_001690473.1		XP_003081619.1	AAL86350.1			EAR82479.1	CBH09097.1	NP_596740.1	EGF81779.1	XP_796785.2	EAW98949.1
CBN78729.1	expressed unknown protein	expressed unknown protein
CBJ48963.1	Arf1, ARF family GTPase	adp-ribosylation factor	EGB09371.1	XP_002286443.1	XP_002177519.1	XP_002900891.1	CDF35576.1	BAM81996.1		XP_003055413.1	XP_003082427.1	AAF17671.1|AC009398_20		EKX43522.1	EAR91328.1	DAA01202.1	NP_596118.1	EGF82945.1	XP_791037.1	CAI23120.1
CBJ26026.1	short-chain alcohol dehydrogenase-like protein	short-chain dehydrogenase reductase sdr	EGB06341.1	XP_002290472.1	XP_002186166.1	XP_002900184.1			XP_001695836.1	XP_003060786.1	XP_003080150.1		56258|estExt_Genewise1Plus.C_890057	EKX32276.1					XP_786605.1
CBJ32017.1	similar to ubiquitin	polyubiquitin c	EGB08038.1		XP_002180198.1	XP_002897374.1				XP_003061956.1	XP_003082269.1	AAM98141.1	46610|estExt_Genewise1.C_60024		EAR98255.1	XP_829056.1	NP_595409.1	EGF80702.1	XP_003724023.1	BAC56951.1
CBJ28572.1	conserved unknown protein	abc transporter b family protein			XP_002186302.1			BAM79212.1					87782|estExt_fgenesh1_pg.C_240074	EKX53578.1		XP_828146.1
CBJ34187.1	hypothetical protein Esi_1304_0001	hypothetical protein Esi_1304_0001
CBJ27197.1	expressed unknown protein	expressed unknown protein
CBN79257.1	kinesin-like protein	kinesin motor domain-containing protein	EGB08320.1	XP_002290867.1		XP_002903807.1			XP_001701617.1	XP_003057525.1			42808|e_gw1.67.5.1	EKX44405.1	EAS02068.1	AAX70387.1		EGF77237.1	XP_784937.3	CAE91142.1
CBJ32839.1	Molecular chaperones HSP70/HSC70, HSP70 superfamily	heat shock protein 70			XP_002177351.1	XP_002902008.1		BAM81783.1	XP_001701326.1				87650|estExt_fgenesh1_pg.C_220175	EKX51038.1	EAR92018.1	XP_829198.1		EGF83438.1	XP_802129.1	CAA68445.1
CBJ27002.1	UDP-glucose 6-dehydrogenase	udp-glucose 6-dehydrogenase
CBJ34262.1	conserved unknown protein	dynein heavy chain
CBN79843.1	Flagellar WD repeat-containing protein Pf 20	flagellar wd repeat-containing protein pf 20	EGB02205.1			XP_002997947.1	CDF36531.1		AAB41727.1	XP_003057884.1		AAR28022.1	54732|estExt_Genewise1Plus.C_420006	EKX49993.1	EAR99424.1	AAC83819.1	NP_592966.1	EGF82406.1	XP_795557.3	AAH25379.1
CBJ27174.1	phosphatase PP1	serine threonine-protein phosphatase pp1	EGB13214.1	XP_002288703.1	XP_002177031.1	XP_002905419.1	CDF35992.1	BAM79305.1	XP_001701579.1	XP_003058354.1	XP_003083177.1	BAF00914.1	50713|estExt_Genewise1.C_900046	EKX49362.1	EAS04563.2	CBH17806.1	NP_596317.1	EGF84191.1	XP_791029.2	CAA52169.1
CBJ29307.1	Heat shock protein 70, likely pseudogene	heat shock protein 70
CBJ25580.1	flagellar associated protein	wd repeat-containing protein 65	EGB03381.1			XP_002904374.1			XP_001701279.1	XP_003057430.1			125876|aug1.1_g584	EKX38878.1	EAS05472.1			EGF83648.1	XP_001179607.2	Q96MR6.3|WDR65_HUMAN
CBN78577.1	udp-n-acetylglucosamine pyrophosphorylase	udp-n-acetylglucosamine pyrophosphorylase	EGB11484.1	XP_002296382.1	XP_002181257.1	XP_002906131.1			XP_001692551.1	XP_003061850.1	XP_003082141.1		89858|estExt_fgenesh1_pg.C_560143	EKX47001.1	EAR84375.2	CAP39913.1	NP_596832.1	EGF82725.1	XP_779933.3	1JVDB
CBN75446.1	conserved unknown protein	conserved unknown protein	EGB04662.1			XP_002902929.1
CBJ30910.1	conserved unknown protein	sperm flagellar protein 2-like
CBJ33217.1	conserved unknown protein	tpr domain containing protein				XP_002901781.1			BAF98914.1					EKX48550.1
CBJ48364.1	conserved unknown protein	ankyrin repeat protein
CBJ28783.1	conserved unknown protein	coiled-coil domain-containing protein 108																EGF77997.1
CBN74315.1	Intraflagellar transport protein 140 puative	intraflagellar transport protein 140 homolog	EGB09316.1			XP_002906384.1			AAT95430.1	XP_003063335.1				EKX53449.1				EGF76575.1	XP_793895.2	BAA25516.2
CBJ29997.1	Glyceraldehyde 3-phosphate dehydrogenase; alternative name: imm downregulated 12	glyceraldehyde 3-phosphate													EAR88958.1
